# Supplementary material for: 13C-metabolic flux analysis of respiratory chain disrupted strain ΔndhF1 of Synechocystis sp. PCC 6803
Source: Springer Nature journal article supplement (doi:10.1007/s12010-024-05138-4), 2025-01-15

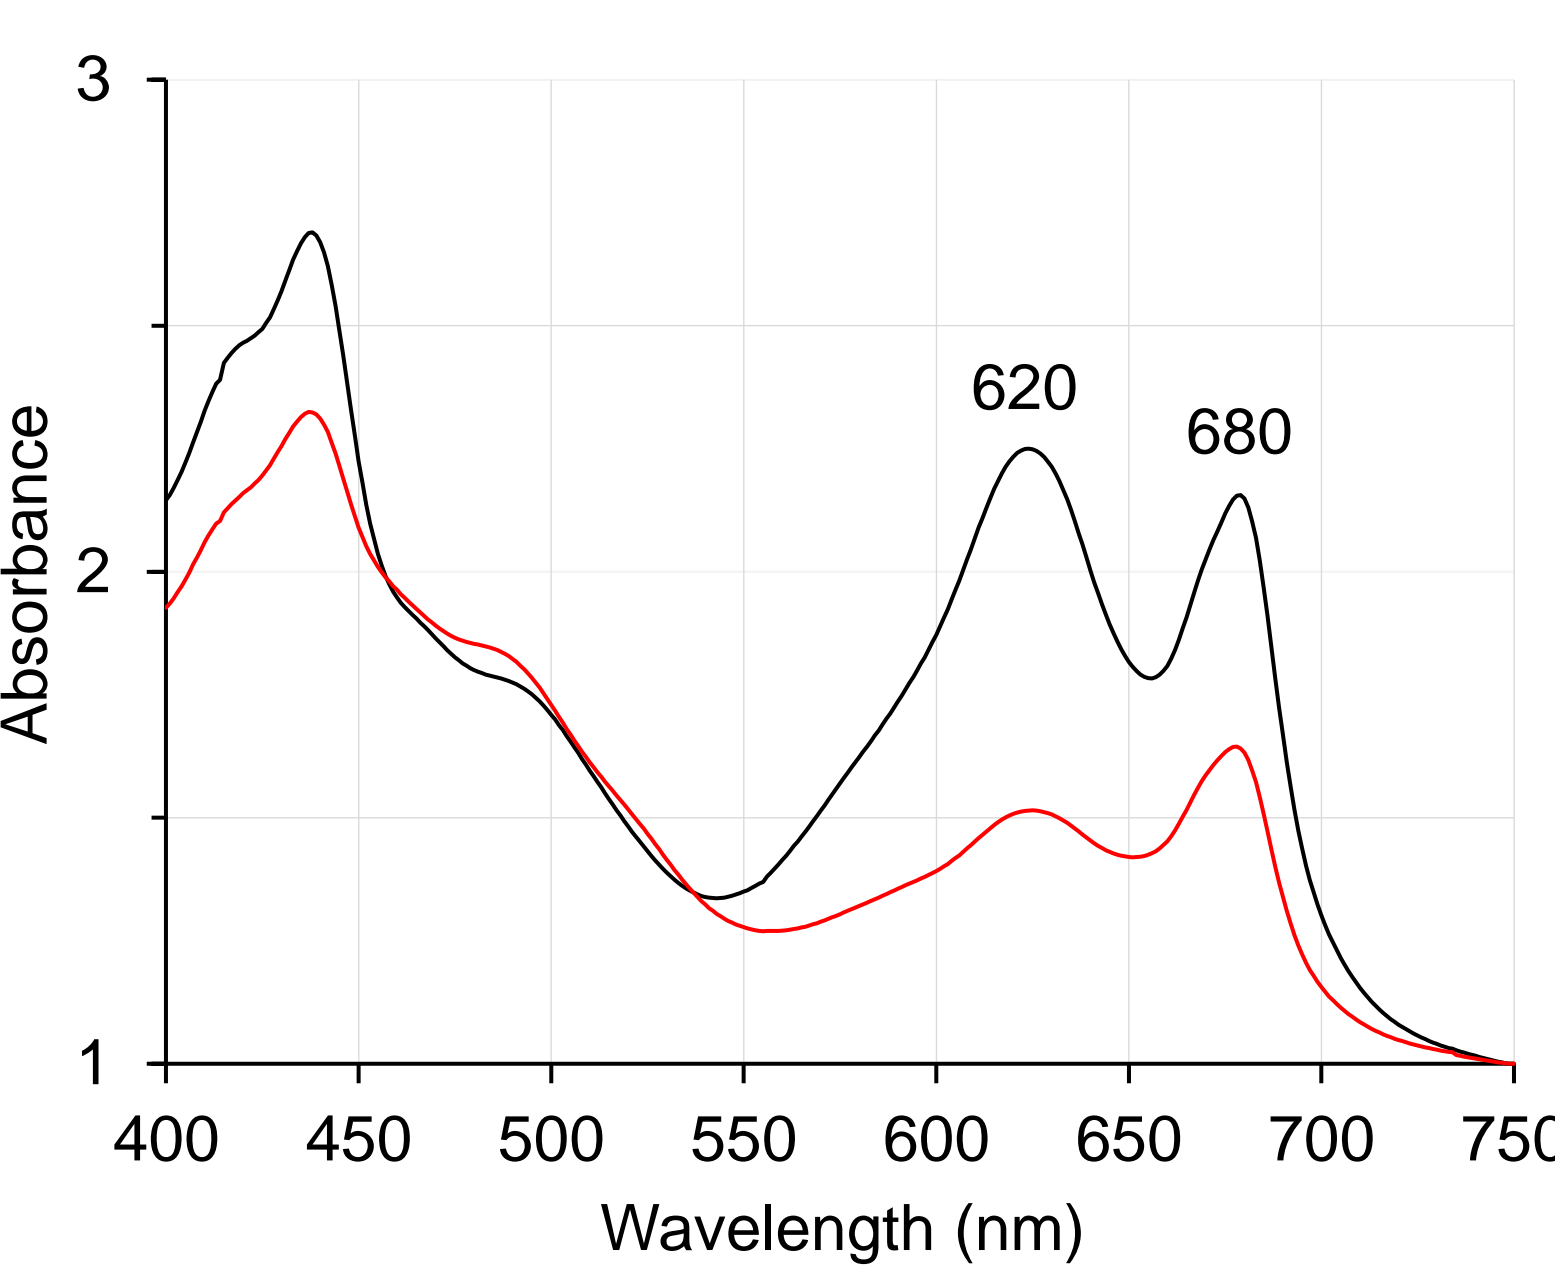

Supplement: MOESM2 [file 12010_2024_5138_MOESM2_ESM.pdf]
